# Supplementary material for: Efficient lignin conversion over Ni/(Fe/Zn/Co/Mo/Cu)–WO3/Al2O3for selectively yielding alkyl phenols
Source: Royal Society of Chemistry journal article supplement (doi:10.1039/d2cy01800d), 2022-11-28
Supplement: d2cy01800d1.pdf [file d2cy01800d1.pdf]

Supporting information for

Efficient lignin conversion over Ni/(Fe/Zn/Co/Mo/Cu)-WO<sub>3</sub>/Al<sub>2</sub>O<sub>3</sub> for selectively  
yielding alkyl phenols

Xinyu Lu, Xiaoli Gu\*

Jiangsu Co-Innovation Center of Efficient Processing and Utilization of Forest Resources, Jiangsu Provincial  
Key Lab for the Chemistry and Utilization of Agro-forest biomass, College of Chemical Engineering, Nanjing  
Forestry University, Nanjing 210037, China.

\*Corresponding authors: guxiaoli@njfu.edu.cn

Figures

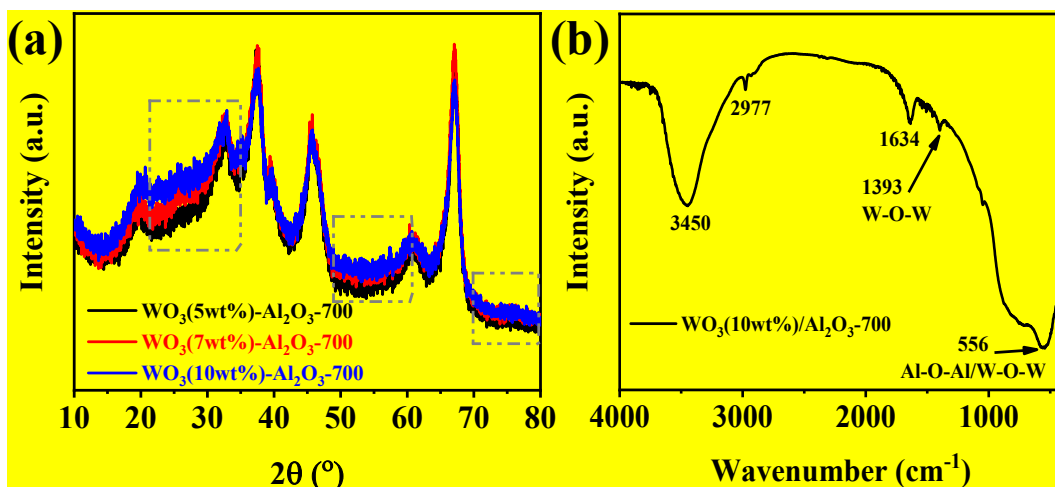

Fig. S1. (a) XRD patterns and (b) FTIR spectrum of tungsten modified supports.

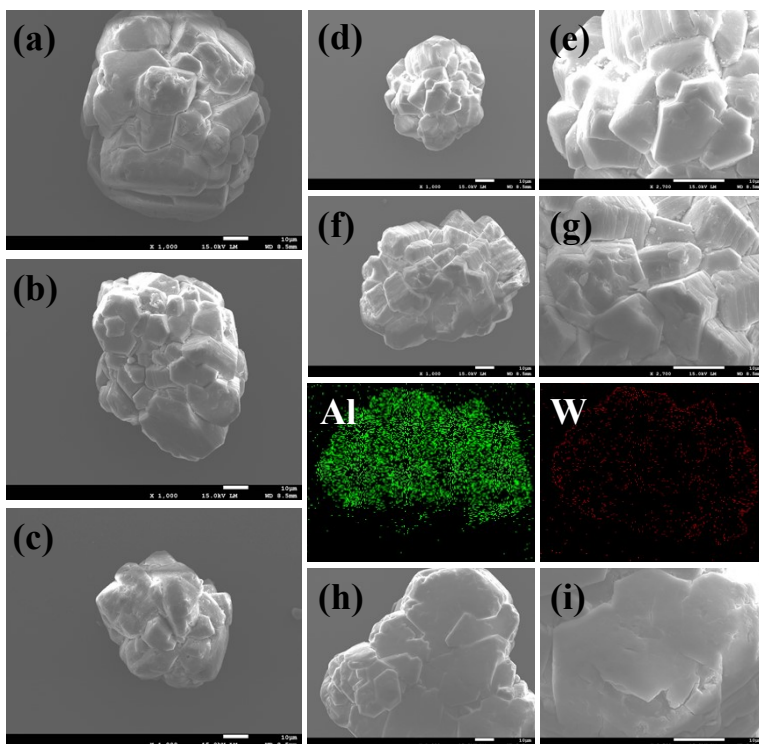

14

15 **Fig. S2.** SEM images of parent  $\text{Al}_2\text{O}_3$  after calcination at (a) 500 °C, (b) 700 °C and (c) 900 °C. SEM images of  
 16  $\text{WO}_3(10\text{wt}\%)/\text{Al}_2\text{O}_3$  under low magnification (d: at 500 °C; f: at 700 °C; h: at 900 °C) and high magnification (e:  
 17 at 500 °C; g: at 700 °C; i: at 900 °C), and EDS analysis (alumina and tungsten elements) of  $\text{WO}_3(10\text{wt}\%)/\text{Al}_2\text{O}_3$   
 18 prepared at 700 °C.

19

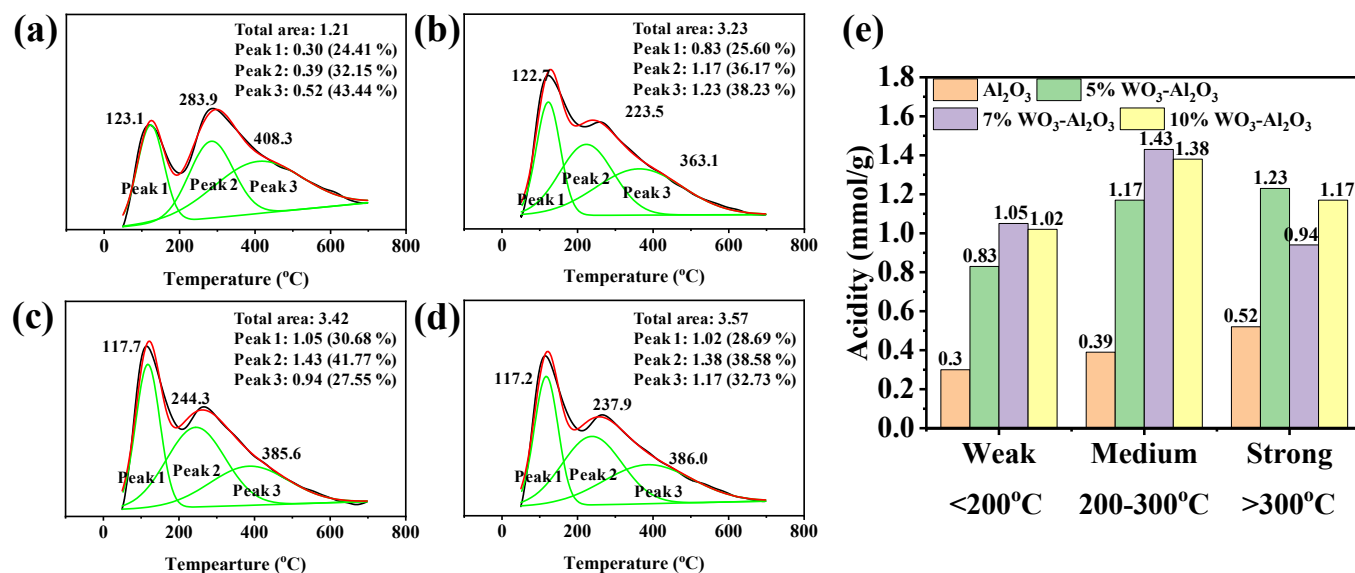

20

21 **Fig. S3.** (a-d) Peak fitting results of  $\text{NH}_3$ -TPD (a:  $\text{Al}_2\text{O}_3$ -700; b:  $\text{WO}_3(5\text{wt}\%)/\text{Al}_2\text{O}_3$ -700; c:  $\text{WO}_3(7\text{wt}\%)/\text{Al}_2\text{O}_3$ -  
 22 700; d:  $\text{WO}_3(10\text{wt}\%)/\text{Al}_2\text{O}_3$ -700), and (e) their acidity contributions.

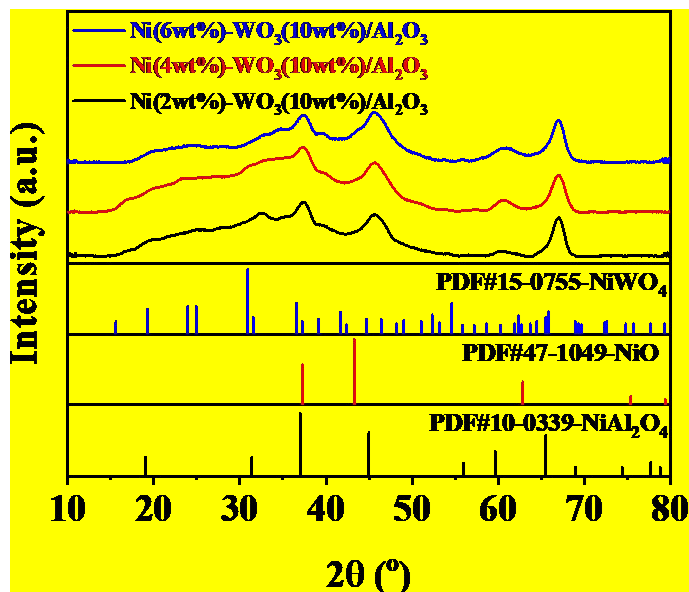

23

24 **Fig. S4.** XRD spectra of Ni-WO<sub>3</sub>(10wt%)/Al<sub>2</sub>O<sub>3</sub> with different Ni loading.

25

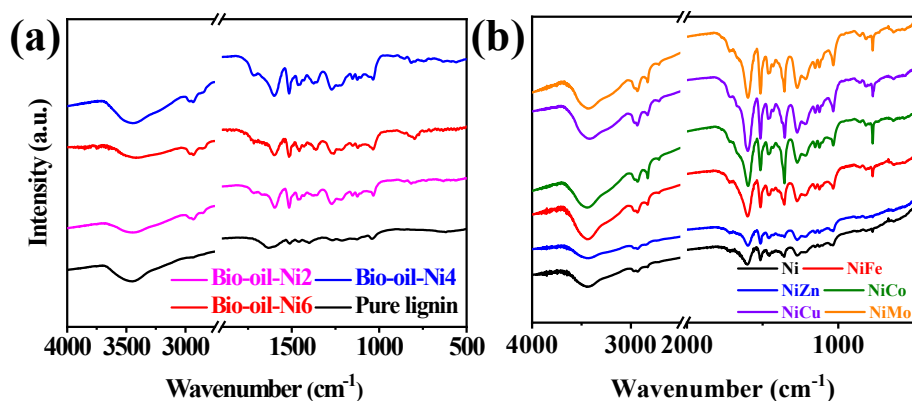

26

27 **Fig. S5.** FTIR spectra of lignin-derived bio-oils obtained from lignin depolymerization at (a) Ni(4~6wt%)-  
 28 WO<sub>3</sub>(10wt%)/Al<sub>2</sub>O<sub>3</sub>-700, and (b) Ni<sub>3wt%</sub>-X<sub>3wt%</sub>/WO<sub>3</sub>(10wt%)/Al<sub>2</sub>O<sub>3</sub>-700 (X = Fe/Zn/Co/Mo/Cu).

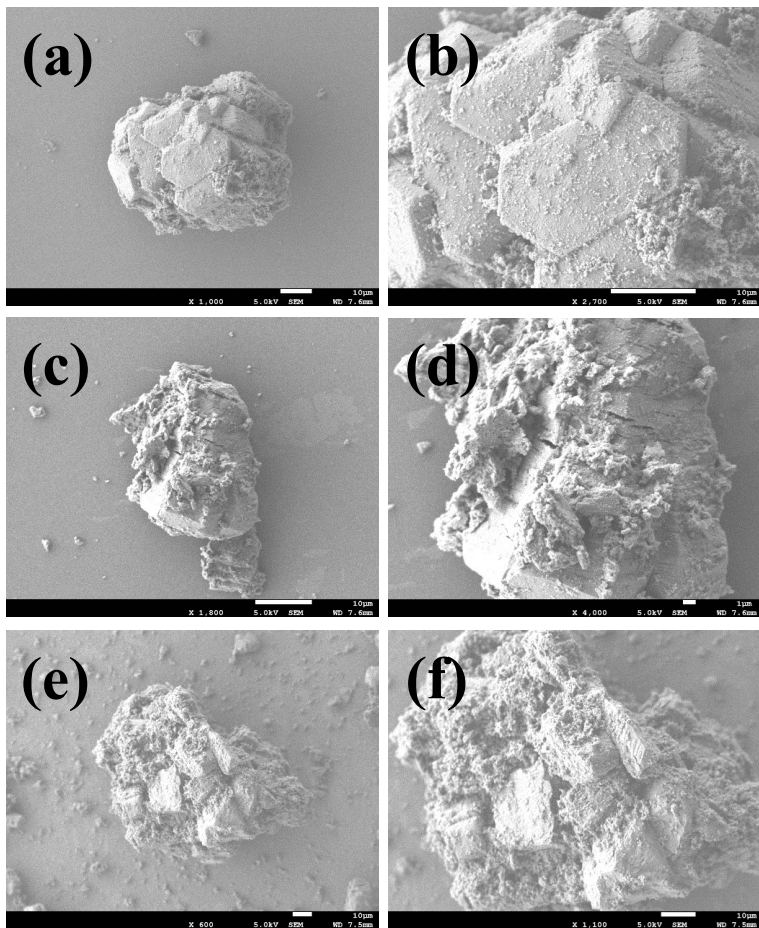

29

30 **Fig. S6.** SEM images of Ni(4 ~ 6 wt%)-WO<sub>3</sub>(10 wt%)/Al<sub>2</sub>O<sub>3</sub>-700 under low magnification (a: 2 wt% Ni loading;  
31 c: 4 wt% Ni loading; e: 6 wt% Ni loading) and high magnification (b: 2 wt% Ni loading, d: 4 wt% Ni loading, f:  
32 6 wt% Ni loading).

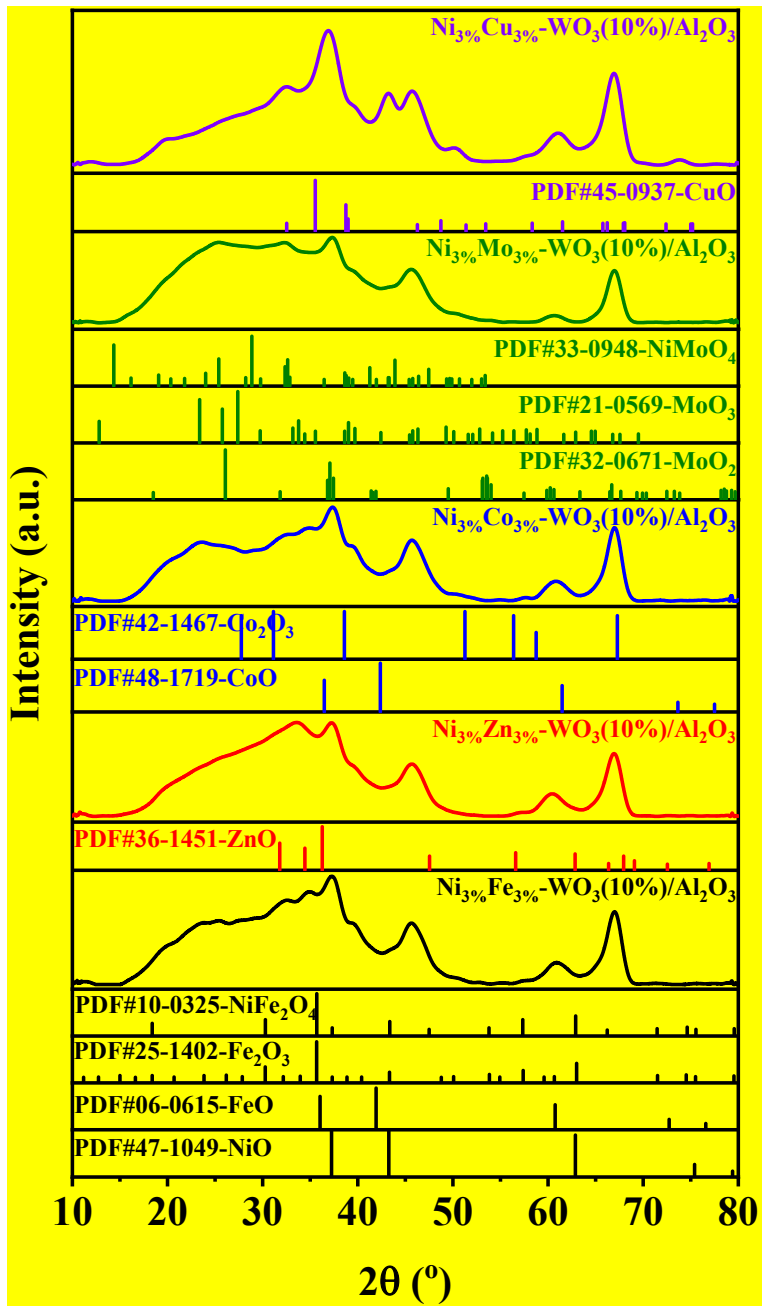

33

34 **Fig. S7.** XRD spectra of  $\text{Ni}_{3\text{wt}\%}\text{-X}_{3\text{wt}\%}/\text{WO}_3(10\text{wt}\%)/\text{Al}_2\text{O}_3\text{-700}$  ( $X = \text{Fe}/\text{Zn}/\text{Co}/\text{Mo}/\text{Cu}$ ).

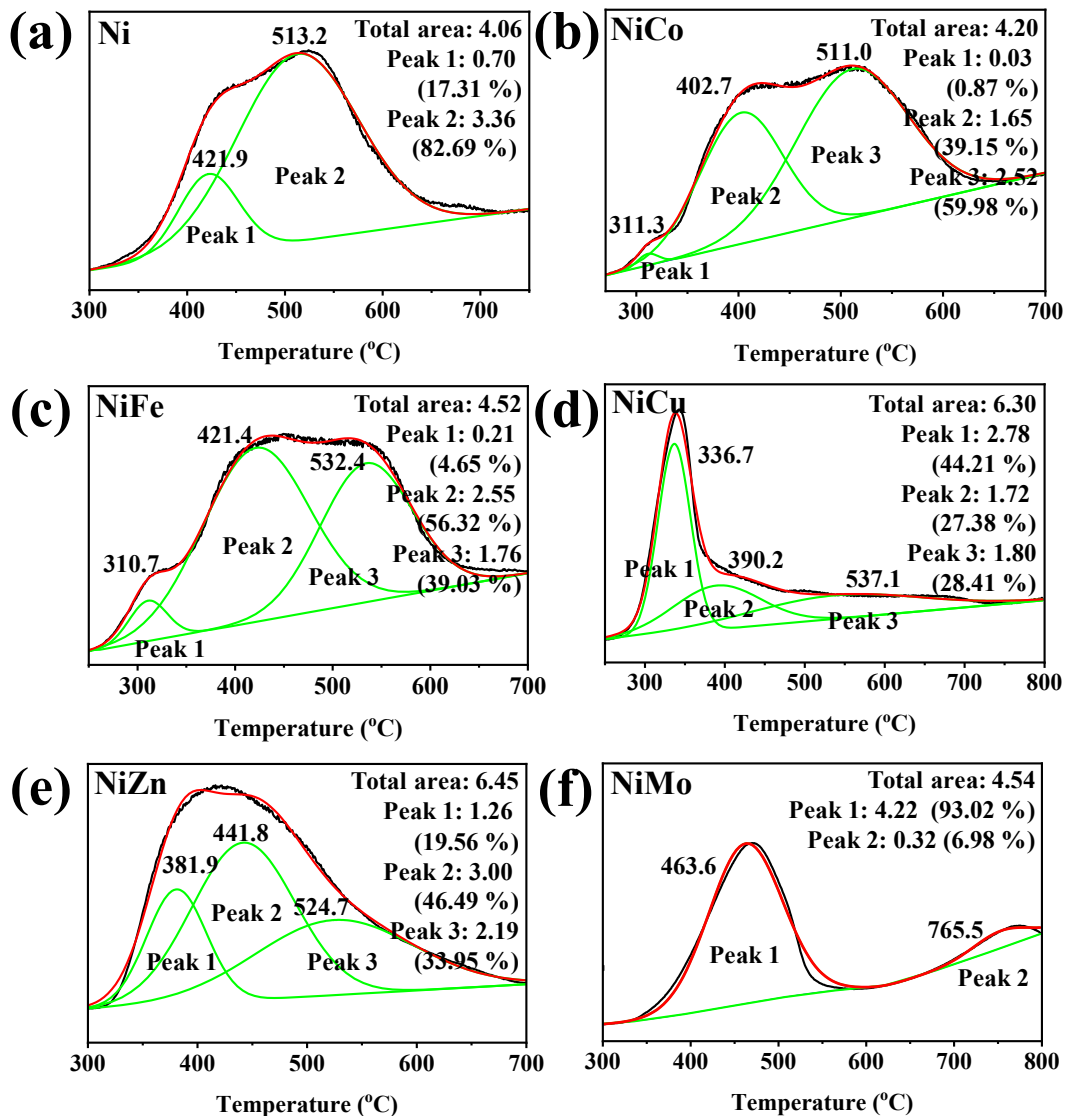

35

36 **Fig. S8.** Peak fitting results of H<sub>2</sub>-TPR of single and bimetallic Ni-based catalysts.

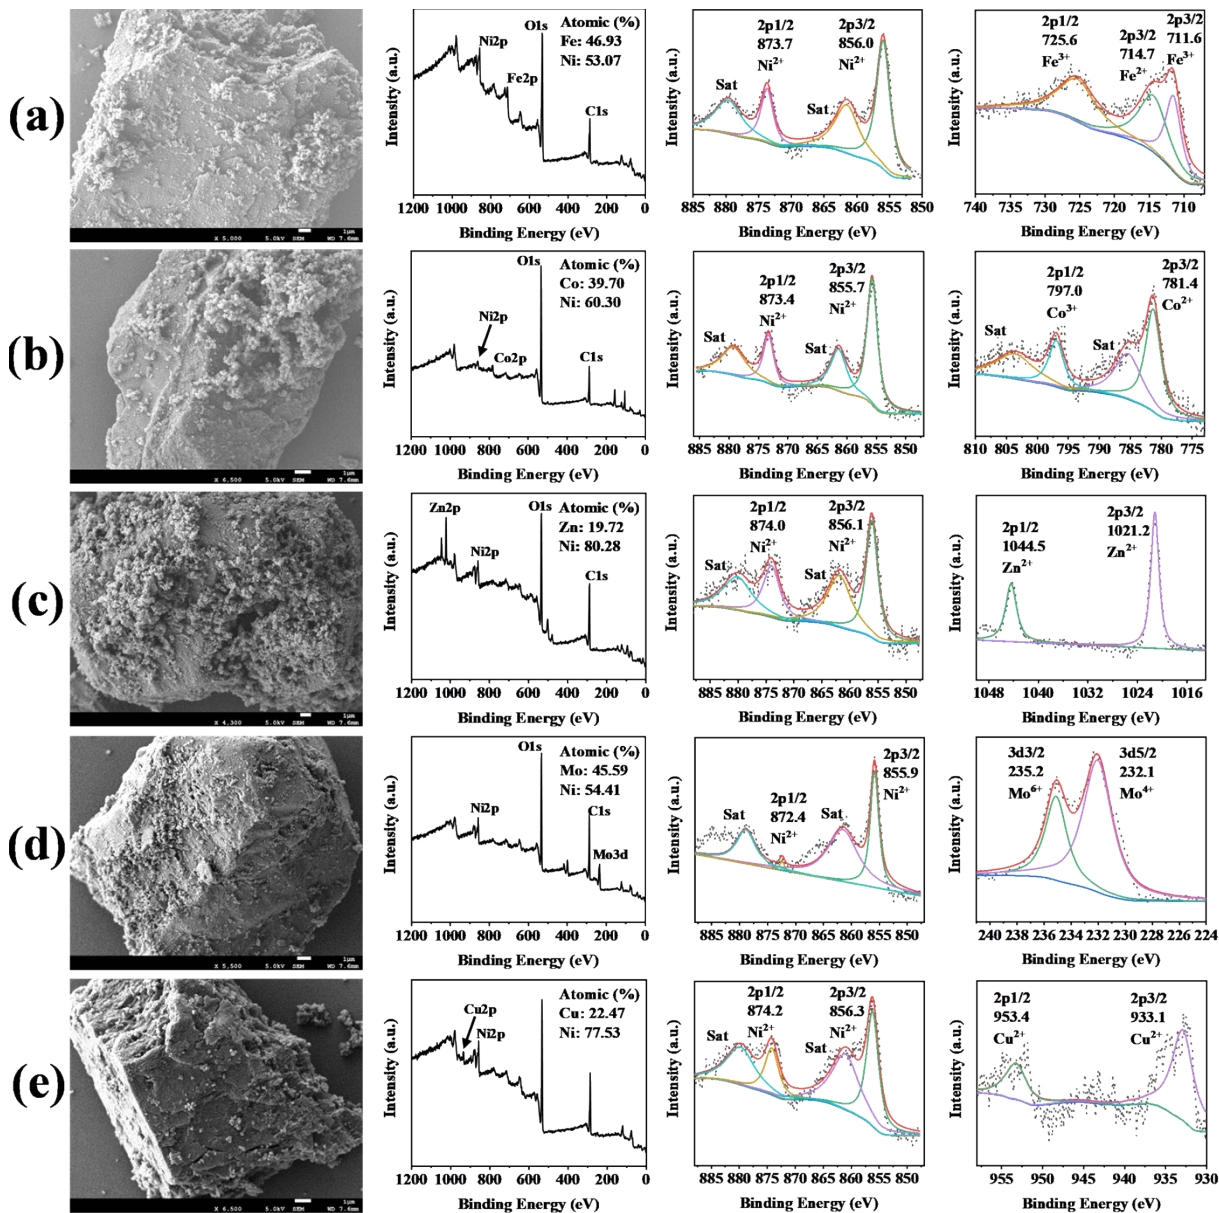

37

38 **Fig. S9.** SEM images and XPS spectra of Ni<sub>3wt%</sub>-X<sub>3wt%</sub>/WO<sub>3</sub>(10wt%)/Al<sub>2</sub>O<sub>3</sub>-700 (X = (a) Fe/(b) Zn/(c) Co/(d)  
 39 Mo/(e) Cu).

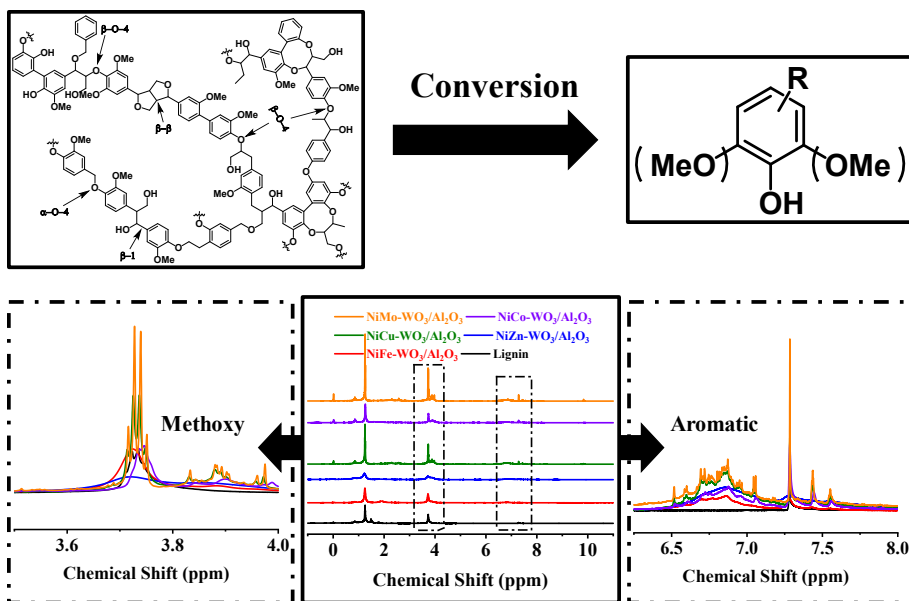

40

41 **Fig. S10.**  $^1\text{H}$  NMR spectra of bio-oils obtained from lignin degradation at Ni(3wt%)-X(3wt%,  
 42 Fe/Zn/Co/Mo/Cu)/WO<sub>3</sub>(10wt%)/Al<sub>2</sub>O<sub>3</sub>-700.

43

#### 44 **Tables**

45 **Table S1.** Elemental analysis of lignin.

| C (wt%) | H (wt%) | N (wt%) | O <sup>a</sup> (wt%) | H:C <sup>b</sup> | O:C <sup>b</sup> |
|---------|---------|---------|----------------------|------------------|------------------|
| 61.85   | 6.87    | 0.15    | 31.13                | 1.33             | 0.38             |

46 <sup>a</sup> Determined via residual mass balance.

47 <sup>b</sup> Molar ratio.

48

49 **Table S2.** Quantitative analysis of representative phenolic compounds in bio-oils.

| Compounds (wt%)      | Ni/Fe | Ni/Zn | Ni/Co | Ni/Mo | Ni/Cu |
|----------------------|-------|-------|-------|-------|-------|
| 2-Methoxy-phenol     | 0.9   | 2.4   | 0.6   | 0.9   | 0.6   |
| Vanillin             | 2.8   | 0.7   | 0.7   | 2.3   | 2.6   |
| Homovanillyl alcohol | 0.5   | 0.7   | 2.9   | 1.1   | 0.9   |

50
